# Supplementary material
Source: Springer Nature journal article supplement (https://www.springermedizin.de/resource/supplementary/12958_2004_145_MOESM15_ESM.pdf/9567240)
Supplement: MOESM15 [file 9567240]

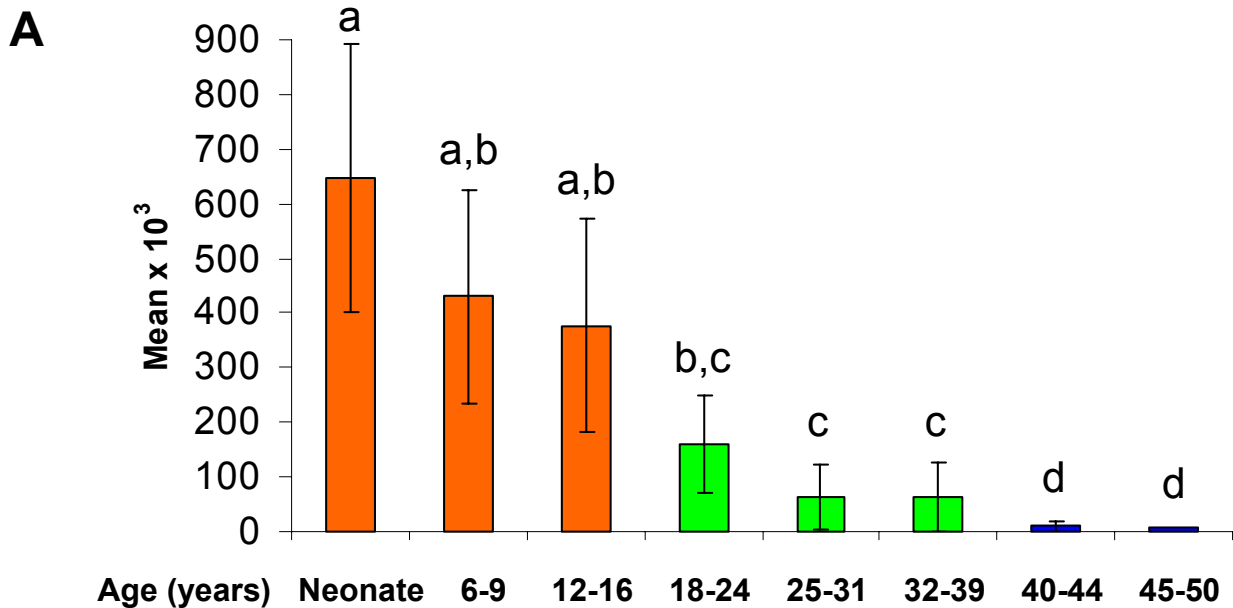

**B**

| <i>x 1000</i>  | <i>Neonate</i> | <i>6-9 y</i> | <i>12-16 y</i> | <i>18-24 y</i> | <i>25-31 y</i> | <i>32-38 y</i> | <i>40-44 y</i> | <i>46-50 y</i> |
|----------------|----------------|--------------|----------------|----------------|----------------|----------------|----------------|----------------|
| Mean           | 648.7          | 430.1        | 376.2          | 158.9          | 62.1           | 63.0           | 9.6            | 6.1            |
| SD             | 245.4          | 205.5        | 195.5          | 83.7           | 55.1           | 49.3           | 9.9            | 8.0            |
| Minimum        | 352.0          | 85.0         | 85.0           | 39.0           | 8.1            | 15.0           | 0.4            | 0.6            |
| <b>Maximum</b> | <b>1126.0</b>  | <b>755.0</b> | <b>591.0</b>   | <b>290.0</b>   | <b>228.0</b>   | <b>208.0</b>   | <b>28.3</b>    | <b>39.3</b>    |
| Sum            | 6487.0         | 4301.0       | 1881.0         | 1271.0         | 807.3          | 945.7          | 153.2          | 140.3          |
| Count          | 10.0           | 10.0         | 5.0            | 8.0            | 13.0           | 15.0           | 16.0           | 23.0           |
| Conf (95%)     | 175.5          | 147.0        | 242.7          | 70.0           | 33.3           | 27.3           | 5.3            | 3.5            |
